# Supplementary material for: Conditional survival and hazards of death for peripheral T-cell lymphomas
Source: PubMed Central journal article supplement (PMC8064157; doi:10.18632/aging.202782), 2021-03-26
Supplement: aging-13-202782-s001.pdf [file aging-13-202782-s001.pdf]

**SUPPLEMENTARY FIGURES**

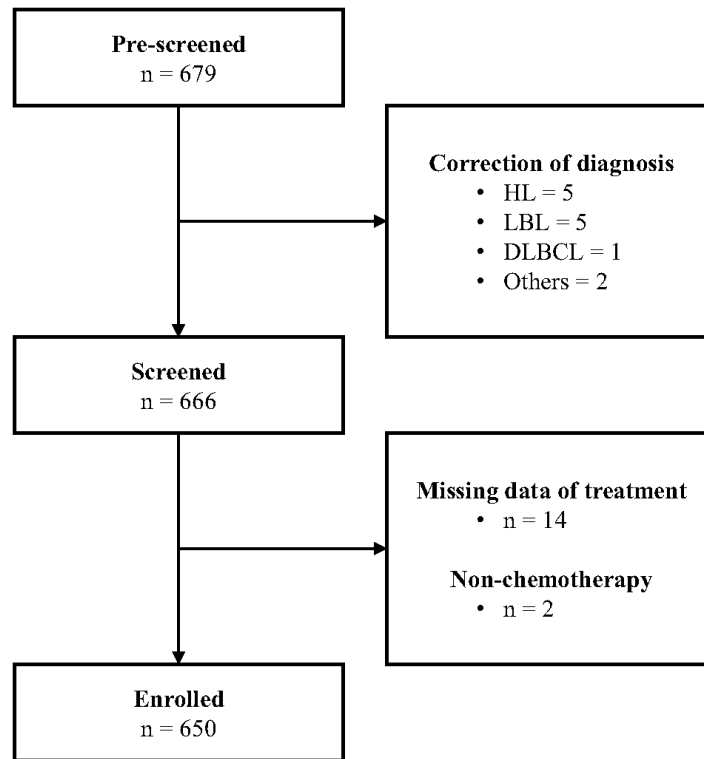

**Supplementary Figure 1. Flow chart for screening eligible patients.**

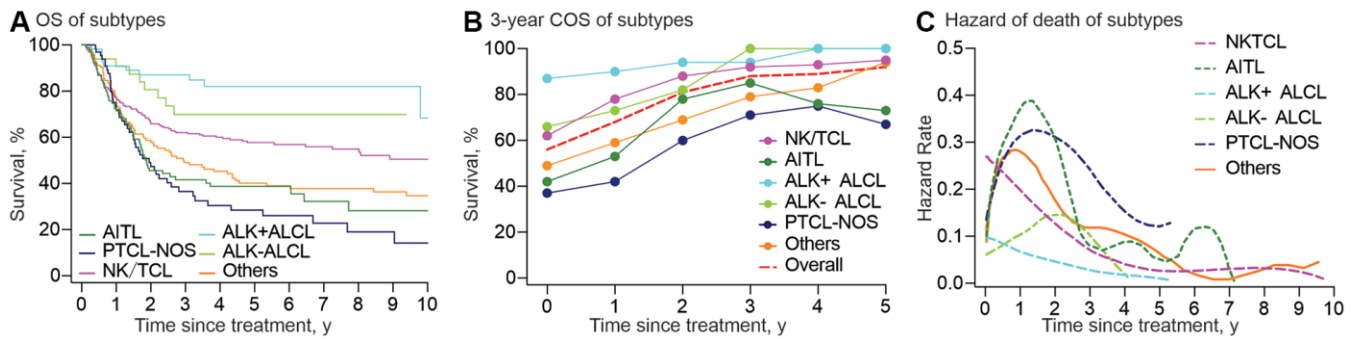

**Supplementary Figure 2. Summary and comparison for different histologic subtypes of PTCLs.** (A) Overall survival for each histologic subtype. (B) Three-year conditional survival for each histologic subtype. The red line represented the 3-year conditional survival for the whole cohort. (C) Smoothed hazard plots for the annual rate of death for each histologic subtype.
