# Supplementary material for: Conditional survival and hazards of death for peripheral T-cell lymphomas
Source: PubMed Central journal article supplement (PMC8064157; doi:10.18632/aging.202782), 2021-03-26
Supplement: aging-13-202782-s002.pdf [file aging-13-202782-s002.pdf]

## SUPPLEMENTARY TABLES

**Supplementary Table 1. The three-year conditional overall survival probabilities for different risk groups over time.**

|                               | Time since treatment |        |        |        |        |
|-------------------------------|----------------------|--------|--------|--------|--------|
|                               | 1 year               | 2 year | 3 year | 4 year | 5 year |
| <b>Risk groups</b>            |                      |        |        |        |        |
| <b>Low-risk</b>               |                      |        |        |        |        |
| 3-year COS (%)                | 82                   | 91     | 95     | 94     | 93     |
| 95%CI (%)                     | 76-86                | 86-94  | 90-97  | 87-97  | 85-97  |
| <b>Low-intermediate-risk</b>  |                      |        |        |        |        |
| 3-year COS (%)                | 57                   | 67     | 77     | 79     | 91     |
| 95%CI (%)                     | 47-65                | 56-77  | 64-86  | 64-88  | 75-97  |
| <b>High-intermediate-risk</b> |                      |        |        |        |        |
| 3-year COS (%)                | 41                   | 55     | 62     | 79     | 90     |
| 95%CI (%)                     | 27-39                | 35-54  | 37-71  | 47-79  | 47-93  |
| <b>High-risk</b>              |                      |        |        |        |        |
| 3-year COS (%)                | 46                   | 82     | NA     | NA     | NA     |
| 95%CI (%)                     | 24-65                | 45-95  | NA     | NA     | NA     |

**Supplementary Table 2. Three-year conditional overall survival probabilities for each histological subtype in PTCLs and the patients with CR over time.**

|                         | Time since treatment |        |         |         |         |
|-------------------------|----------------------|--------|---------|---------|---------|
|                         | 1 year               | 2 year | 3 year  | 4 year  | 5 year  |
| <b>All patients</b>     |                      |        |         |         |         |
| 3-year COS (%)          | 68                   | 81     | 88      | 89      | 92      |
| 95%CI (%)               | 64-73                | 76-85  | 83-91   | 84-93   | 85-95   |
| <b>Patients with CR</b> |                      |        |         |         |         |
| 3-year COS (%)          | 80                   | 87     | 91      | 90      | 91      |
| 95%CI (%)               | 74-85                | 80-91  | 85-95   | 81-95   | 80-96   |
| <b>NK/TCL</b>           |                      |        |         |         |         |
| 3-year COS (%)          | 78                   | 88     | 92      | 93      | 95      |
| 95%CI (%)               | 71-83                | 81-92  | 84-96   | 85-97   | 85-98   |
| <b>Patients with CR</b> |                      |        |         |         |         |
| 3-year COS (%)          | 84                   | 88     | 92      | 93      | 94      |
| 95%CI (%)               | 76-90                | 79-93  | 84-97   | 82-97   | 78-98   |
| <b>AITL</b>             |                      |        |         |         |         |
| 3-year COS (%)          | 53                   | 78     | 85      | 76      | 73      |
| 95%CI (%)               | 40-65                | 59-89  | 65-94   | 47-91   | 37-91   |
| <b>Patients with CR</b> |                      |        |         |         |         |
| 3-year COS (%)          | 74                   | 94     | 94      | 73      | 62      |
| 95%CI (%)               | 56-86                | 67-99  | 67-99   | 36-91   | 21-86   |
| <b>ALK-ALCL</b>         |                      |        |         |         |         |
| 3-year COS (%)          | 73                   | 82     | 100     | 100     | 100     |
| 95%CI (%)               | 51-86                | 58-93  | 100-100 | 100-100 | 100-100 |
| <b>Patients with CR</b> |                      |        |         |         |         |
| 3-year COS (%)          | 79                   | 85     | NA      | NA      | NA      |
| 95%CI (%)               | 47-93                | 51-96  | NA      | NA      | NA      |
| <b>ALK+ALCL</b>         |                      |        |         |         |         |
| 3-year COS (%)          | 90                   | 94     | 94      | 100     | 100     |
| 95%CI (%)               | 76-96                | 78-99  | 78-99   | 100-100 | 100-100 |
| <b>Patients with CR</b> |                      |        |         |         |         |
| 3-year COS (%)          | 95                   | 95     | 95      | 100     | 100     |
| 95%CI (%)               | 71-99                | 71-99  | 71-99   | 100-100 | 100-100 |
| <b>PTCL-NOS</b>         |                      |        |         |         |         |
| 3-year COS (%)          | 42                   | 60     | 71      | 75      | 67      |
| 95%CI (%)               | 27-57                | 38-77  | 44-87   | 39-91   | 27-88   |
| <b>Patients with CR</b> |                      |        |         |         |         |
| 3-year COS (%)          | 58                   | 67     | 61      | 74      | 83      |
| 95%CI (%)               | 30-78                | 34-86  | 25-83   | 29-93   | 27-97   |
| <b>Others</b>           |                      |        |         |         |         |
| 3-year COS (%)          | 59                   | 69     | 79      | 83      | 94      |
| 95%CI (%)               | 48-68                | 56-79  | 65-88   | 68-92   | 79-99   |
| <b>Patients with CR</b> |                      |        |         |         |         |
| 3-year COS (%)          | 84                   | 83     | 93      | 93      | NA      |
| 95%CI (%)               | 59-95                | 55-94  | 59-99   | 59-99   | NA      |

AITL: angioimmunoblastic T-cell lymphoma; ALK: anaplastic lymphoma kinase positive; ALCL: anaplastic large cell lymphoma; PTCL: peripheral T-cell lymphoma; NKTCL: NK/T cell lymphoma. PTCL, NOS: peripheral T-cell lymphoma, unspecified. LDH: lactate dehydrogenase; ULN: upper limit of normal. CR: complete response.
